# Supplementary material for: Monilophyte mitochondrial rps1 genes carry a unique group II intron that likely originated from an ancient paralog in rpl2
Source: PubMed Central journal article supplement — RNA. 2016 Sep;22(9):1338–48. doi: 10.1261/rna.056572.116 (PMC4986890; doi:10.1261/rna.056572.116), 2016-09
Supplement: supp_056572.116_Supplemental_Fig_1.pdf [file supp_056572.116_Supplemental_Fig_1.pdf]

## Supplementary figure 1

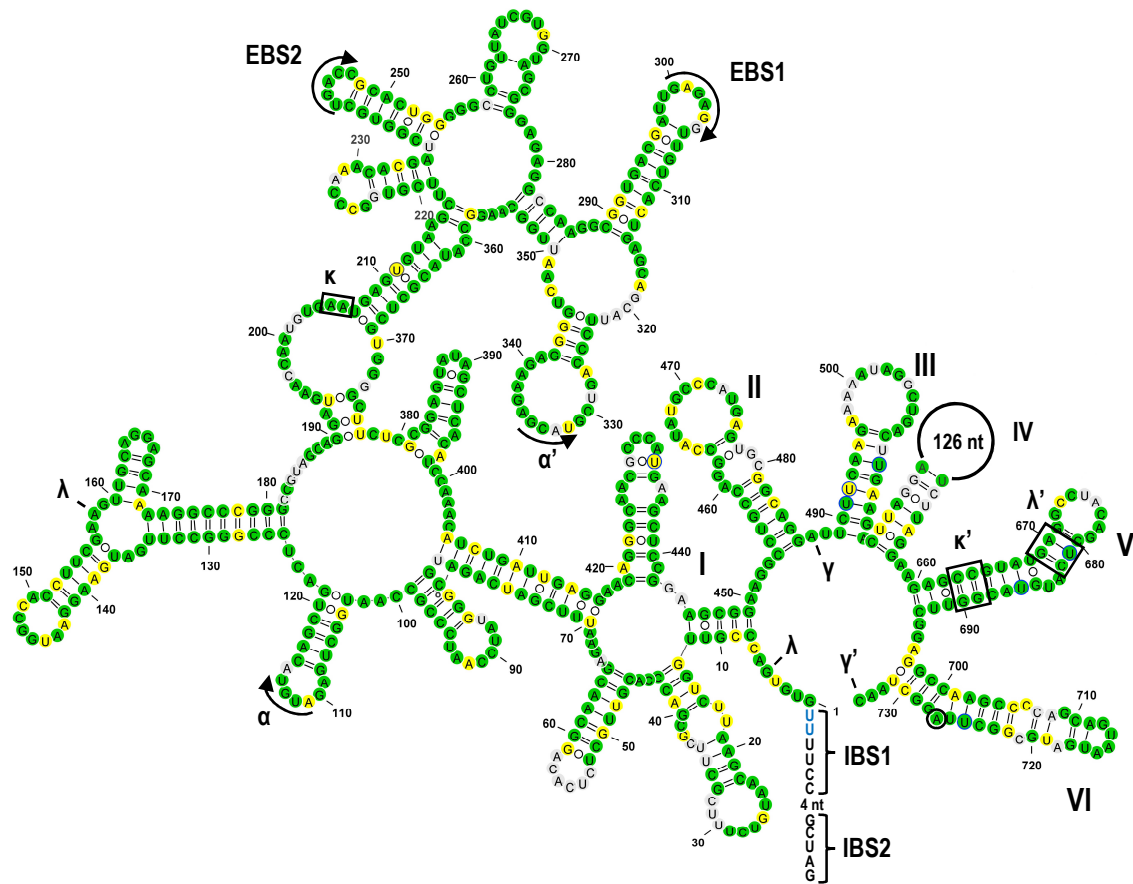

**Supplementary figure 1.** Secondary structure model of rpl2i846g2, exemplarily shown for *Gleichenia dicarpa*, features all structural elements typically conserved in group II introns (McNeil et al. 2016; Michel et al. 1989; Michel and Ferat 1995; Qin and Pyle 1998; Simon et al. 2008; Toor et al. 2001). The six intron domains are labelled with Roman numerals (I to VI) and the tertiary interaction sites with Greek letters. Exon binding sites (EBS) and corresponding intron binding sites (IBS) in the 5' exon are indicated. All nucleotide positions which are identical the rpl2i846g2 paralogue are shown in green. Differences in nucleotide sequences which can be explained by transitions (A/G and C/U) are shown in yellow and all other nucleotides are shown in grey. Experimentally verified RNA editing sites in the intron are marked with blue (C to U RNA editing) or red (reverse U to C RNA editing) circles. Exonal C-to-U editing sites are indicated with blue letters. The branch point adenosine for lariat formation is encircled. The intron was drawn with the VARNA software (Darty et al. 2009).
